# Supplementary material
Source: PubMed Central journal article supplement (PMC4657137)
Supplement: NIHMS734001-supplement-Suppl_Table_1.pdf [file NIHMS734001-supplement-Suppl_Table_1.pdf]

## SUPPLEMENTARY TABLES

**Supplementary Table 1.** Source, clone, and dilution of antibodies used.

| Antibody             | Clone      | Dilution     | Source     | Pretreatment                                              |
|----------------------|------------|--------------|------------|-----------------------------------------------------------|
| <i>UCSF cohort</i>   |            |              |            |                                                           |
| CD68                 | M0876      | 1:50         | DAKO       | Microwave 10 min, citrate buffer                          |
| PCNA                 | M0879      | 1:500        | DAKO       | Microwave 10 min, citrate buffer                          |
| <i>U of C cohort</i> |            |              |            |                                                           |
| CD68                 | M0814      | 1:200        | DAKO       | Microwave 15 min, target retrieval solution (DAKO, S1699) |
| PCNA                 | M0879      | 1:200        | DAKO       | Microwave 15 min, target retrieval solution (DAKO, S1699) |
| ER                   | SP1        | 1:50         | NeoMarkers | Microwave 30 min, citrate buffer                          |
| PR                   | SP2        | 1:50         | NeoMarkers | Microwave 30 min, citrate buffer                          |
| HER2/neu             | HercepTest | Ready-to-use | DAKO       | Microwave 15 min, epitope retrieval solution              |
| EGFR                 | 2-18C9     | Ready-to-use | DAKO       | Proteinase K (DAKO, PharmDX, K1494)                       |
| Cytokeratin 5/6      | D5/16 B4   | 1:100        | DAKO       | Microwave 30 min, citrate buffer                          |
